# Supplementary material
Source: PubMed Central journal article supplement (PMC5775895)
Supplement: mic-163-961-s001.pdf [file mic-163-961-s001.pdf]

**TABLE S1. Primers**

| Primer | Sequence                                                                       |
|--------|--------------------------------------------------------------------------------|
| KC19   | ATATATATGAATTCACCATGGAAACCCGATTCCTCAG                                          |
| KC30   | CGGCAGAAAAGTCCACATTG                                                           |
| KC31   | CACACTACCATCGGCGCTA                                                            |
| KC407  | GACAACAAAGAAGTTCAACTCTTTATGTATTGATCTTCATCGCGATCT<br>TTCTCTCGAAATTTACCAATCAATTG |
| KC408  | CAAAGAAGTTCAACTCTTTATGTATTGATCTTCCTCGTGATCTTTCTCTCGAAA<br>TTTACCAATCAATTGCTTC  |
| KC409  | CTCTTTATGTATTGATCTTCCTCGCGATCTTTATCTCGAAATTTACCAATCAAT<br>TGCTTCTGTCG          |
| KC410  | CTCTTTATGTATTGATCTTCCTCGCGATCTTTGTCTCGAAATTTACCAATCAAT<br>TGCTTCTGTCG          |

**Table S2.** Single-base change alleles of *L*

| <b>Serial</b> | <b>Mutant number<sup>§</sup></b> | <b>Position of the mutation in <i>L</i></b> | <b>Base pair(s) changed</b> | <b>Amino acid(s) position</b> | <b>Amino acid(s) changed</b> | <b>Lysis*</b> | <b>Protein levels<sup>#</sup></b> |
|---------------|----------------------------------|---------------------------------------------|-----------------------------|-------------------------------|------------------------------|---------------|-----------------------------------|
| 1             | 90                               | 3                                           | G→T                         | 1                             | M→I                          | -             | -                                 |
| 2             | 185                              | 3                                           | G→A                         | 1                             | M→I                          | -             | -                                 |
| 3             | 205                              | 2                                           | T→C                         | 1                             | M→T                          | -             | -                                 |
| 4             | 261                              | 4                                           | G→T                         | 2                             | E→Stop                       | -             | N.D.                              |
| 5             | 190                              | 8                                           | C→T                         | 3                             | T→I                          | -             | -                                 |
| 6             | 223                              | 7                                           | A→T                         | 3                             | T→S                          | -             | -                                 |
| 7             | 326                              | 17                                          | C→T                         | 6                             | P→L                          | -             | -                                 |
| 8             | 127                              | 22                                          | C→T                         | 8                             | Q→Stop                       | -             | N.D.                              |
| 9             | 139                              | 23                                          | A→T                         | 8                             | Q→L                          | -             | -                                 |
| 10            | 288                              | 23                                          | A→T                         | 8                             | Q→L                          | -             | -                                 |
| 11            | 219                              | 28                                          | C→T                         | 10                            | Q→Stop                       | -             | N.D.                              |
| 12            | 391                              | 31                                          | C→T                         | 11                            | Q→Stop                       | -             | N.D.                              |
| 13            | 65                               | 38                                          | C→T                         | 13                            | P→L                          | +             | +                                 |
| 14            | 345                              | 38                                          | C→T                         | 13                            | P→L                          | +             | +                                 |
| 15            | 331                              | 43                                          | T→G                         | 15                            | S→A                          | +             | +                                 |
| 16            | 50                               | 52                                          | A→G                         | 18                            | R→G                          | +             | +                                 |
| 17            | 177                              | 53                                          | G→T                         | 18                            | R→I                          | +             | +                                 |
| 18            | 291                              | 52                                          | A→T                         | 18                            | R→Stop                       | -             | N.D.                              |
| 19            | 48                               | 55                                          | C→A                         | 19                            | R→S                          | +             | -                                 |
| 20            | 67                               | 56                                          | G→A                         | 19                            | R→H                          | +             | -                                 |
| 21            | 142                              | 58                                          | C→T                         | 20                            | R→W                          | +             | -                                 |
| 22            | 170                              | 58                                          | C→T                         | 20                            | R→W                          | +             | -                                 |
| 23            | 313                              | 59                                          | G→T                         | 20                            | R→L                          | +             | -                                 |
| 24            | 183                              | 67                                          | A→G                         | 23                            | K→E                          | +             | -                                 |
| 25            | 319                              | 67                                          | A→G                         | 23                            | K→E                          | +             | -                                 |
| 26            | 321                              | 67                                          | A→T                         | 23                            | K→Stop                       | -             | N.D.                              |
| 27            | 343                              | 67                                          | A→G                         | 23                            | K→E                          | +             | -                                 |
| 28            | 384                              | 67                                          | A→T                         | 23                            | K→Stop                       | -             | N.D.                              |
| 29            | 46                               | 74                                          | A→T                         | 25                            | E→V                          | +             | -                                 |
| 30            | 172                              | 74                                          | A→G                         | 25                            | E→G                          | +             | -                                 |
| 31            | 184                              | 75                                          | G→T                         | 25                            | E→D                          | +             | -                                 |
| 32            | 300                              | 74                                          | A→G                         | 25                            | E→G                          | +             | -                                 |
| 33            | 301                              | 74                                          | A→G                         | 25                            | E→G                          | +             | -                                 |
| 34            | 302                              | 74                                          | A→G                         | 25                            | E→G                          | +             | -                                 |
| 35            | 307                              | 74                                          | A→G                         | 25                            | E→G                          | +             | -                                 |

|    |     |     |     |    |        |   |      |
|----|-----|-----|-----|----|--------|---|------|
| 36 | 308 | 74  | A→G | 25 | E→G    | + | -    |
| 37 | 309 | 74  | A→G | 25 | E→G    | + | -    |
| 38 | 317 | 74  | A→G | 25 | E→G    | + | -    |
| 39 | 322 | 74  | A→G | 25 | E→G    | + | -    |
| 40 | 323 | 74  | A→G | 25 | E→G    | + | -    |
| 41 | 324 | 74  | A→G | 25 | E→G    | + | -    |
| 42 | 327 | 74  | A→G | 25 | E→G    | + | -    |
| 43 | 192 | 77  | A→G | 26 | D→G    | + | -    |
| 44 | 157 | 81  | C→G | 27 | Y→Stop | - | N.D. |
| 45 | 200 | 87  | T→A | 29 | C→Stop | - | N.D. |
| 46 | 268 | 86  | G→A | 29 | C→R    | - | -    |
| 47 | 294 | 87  | T→A | 29 | C→Stop | - | N.D. |
| 48 | 77  | 89  | G→A | 30 | R→Q    | + | +    |
| 49 | 265 | 89  | G→T | 30 | R→L    | + | +    |
| 50 | 344 | 88  | C→T | 30 | R→Stop | - | N.D. |
| 51 | 365 | 88  | C→T | 30 | R→Stop | - | N.D. |
| 52 | 166 | 91  | A→T | 31 | R→Stop | - | N.D. |
| 53 | 253 | 91  | A→T | 31 | R→Stop | - | N.D. |
| 54 | 267 | 92  | G→T | 31 | R→I    | + | +    |
| 55 | 394 | 94  | C→T | 32 | Q→Stop | - | N.D. |
| 56 | 10  | 99  | A→T | 33 | Q→H    | - | +    |
| 57 | 57  | 99  | A→T | 33 | Q→H    | - | +    |
| 58 | 196 | 97  | C→T | 33 | Q→Stop | - | N.D. |
| 59 | 361 | 97  | C→T | 33 | Q→Stop | - | N.D. |
| 60 | 243 | 100 | A→T | 34 | R→Stop | - | N.D. |
| 61 | 348 | 100 | A→T | 34 | R→Stop | - | N.D. |
| 62 | 213 | 107 | C→G | 36 | S→Stop | - | N.D. |
| 63 | 358 | 107 | C→A | 36 | S→Stop | - | N.D. |
| 64 | 3   | 115 | T→C | 39 | Y→H    | - | -    |
| 65 | 252 | 117 | T→A | 39 | Y→Stop | - | N.D. |
| 66 | 356 | 117 | T→A | 39 | Y→Stop | - | N.D. |
| 67 | 375 | 119 | T→A | 40 | V→E    | - | -    |
| 68 | 276 | 122 | T→A | 41 | L→Stop | - | N.D. |
| 69 | 285 | 122 | T→A | 41 | L→Stop | - | N.D. |
| 70 | 290 | 122 | T→A | 41 | L→Stop | - | N.D. |
| 71 | 149 | 125 | T→A | 42 | I→N    | - | -    |
| 72 | 211 | 127 | T→C | 43 | F→L    | - | +    |
| 73 | 52  | 130 | C→G | 44 | L→V    | - | +    |
| 74 | 234 | 131 | T→C | 44 | L→P    | + | +    |
| 75 | 258 | 131 | T→C | 44 | L→P    | + | +    |
| 76 | 31  | 133 | G→C | 45 | A→P    | + | +    |

|     |     |     |     |    |        |   |      |
|-----|-----|-----|-----|----|--------|---|------|
| 77  | 7   | 137 | T→A | 46 | I→N    | - | -    |
| 78  | 34  | 136 | A→T | 46 | I→F    | + | +    |
| 79  | 227 | 137 | T→A | 46 | I→N    | - | -    |
| 80  | 133 | 140 | T→A | 47 | F→Y    | - | +    |
| 81  | 203 | 140 | T→A | 47 | F→Y    | - | +    |
| 82  | 353 | 140 | T→A | 47 | F→Y    | - | +    |
| 83  | 221 | 143 | T→C | 48 | L→P    | - | +    |
| 84  | 95  | 146 | C→T | 49 | S→L    | - | +    |
| 85  | 155 | 146 | C→A | 49 | S→Stop | - | N.D. |
| 86  | 160 | 146 | C→T | 49 | S→L    | - | +    |
| 87  | 224 | 145 | T→A | 49 | S→T    | - | +    |
| 88  | 320 | 146 | C→A | 49 | S→Stop | - | N.D. |
| 89  | 389 | 145 | T→A | 49 | S→T    | - | +    |
| 90  | 2   | 148 | A→G | 50 | K→E    | - | +    |
| 91  | 106 | 150 | A→T | 50 | K→N    | - | +    |
| 92  | 118 | 150 | A→T | 50 | K→N    | - | +    |
| 93  | 187 | 148 | A→T | 50 | K→Stop | - | N.D. |
| 94  | 206 | 149 | A→T | 50 | K→I    | - | +    |
| 95  | 229 | 150 | A→T | 50 | K→N    | - | +    |
| 96  | 259 | 148 | A→C | 50 | K→Q    | - | -    |
| 97  | 293 | 149 | A→T | 50 | K→I    | - | +    |
| 98  | 318 | 148 | A→G | 50 | K→E    | - | +    |
| 99  | 342 | 150 | A→T | 50 | K→N    | - | +    |
| 100 | 378 | 148 | A→T | 50 | K→Stop | - | N.D. |
| 101 | 383 | 150 | A→T | 50 | K→N    | - | +    |
| 102 | 396 | 148 | A→T | 50 | K→Stop | - | N.D. |
| 103 | 41  | 152 | T→C | 51 | F→S    | - | +    |
| 104 | 83  | 152 | T→C | 51 | F→S    | - | +    |
| 105 | 314 | 155 | C→A | 52 | T→N    | - | -    |
| 106 | 19  | 158 | A→G | 53 | N→S    | - | +    |
| 107 | 59  | 158 | A→G | 53 | N→S    | - | +    |
| 108 | 114 | 157 | A→G | 53 | N→D    | - | +    |
| 109 | 161 | 157 | A→C | 53 | N→H    | - | +    |
| 110 | 165 | 158 | A→G | 53 | N→S    | - | +    |
| 111 | 250 | 158 | A→T | 53 | N→I    | - | -    |
| 112 | 334 | 159 | T→A | 53 | N→Q    | - | -    |
| 113 | 355 | 159 | T→A | 53 | N→K    | - | -    |
| 114 | 370 | 159 | T→A | 53 | N→Q    | - | -    |
| 115 | 85  | 160 | C→T | 54 | Q→Stop | - | -    |
| 116 | 107 | 164 | T→A | 55 | L→Stop | - | N.D. |
| 117 | 306 | 164 | T→A | 55 | L→Stop | - | N.D. |

|     |     |     |     |    |        |   |      |
|-----|-----|-----|-----|----|--------|---|------|
| 118 | 22  | 167 | T→A | 56 | L→H    | - | +    |
| 119 | 55  | 167 | T→A | 56 | L→H    | - | +    |
| 120 | 242 | 167 | T→A | 56 | L→H    | - | +    |
| 121 | 277 | 167 | T→C | 56 | L→P    | - | -    |
| 122 | 296 | 167 | T→C | 56 | L→P    | - | -    |
| 123 | 385 | 167 | T→A | 56 | L→H    | - | +    |
| 124 | 350 | 170 | T→C | 57 | L→P    | - | -    |
| 125 | 108 | 179 | T→C | 60 | L→P    | - | -    |
| 126 | 204 | 178 | C→G | 60 | L→V    | - | -    |
| 127 | 247 | 179 | T→A | 60 | L→Q    | - | -    |
| 128 | 304 | 179 | T→C | 60 | L→P    | - | -    |
| 129 | 372 | 179 | T→A | 60 | L→Q    | - | -    |
| 130 | 216 | 188 | T→A | 63 | V→E    | - | +    |
| 131 | 371 | 188 | T→A | 63 | V→E    | - | +    |
| 132 | 103 | 197 | C→A | 66 | T→K    | - | +    |
| 133 | 215 | 197 | C→G | 66 | T→R    | - | -    |
| 134 | 171 | 205 | A→T | 69 | T→S    | - | -    |
| 135 | 138 | 211 | C→T | 71 | Q→Stop | - | N.D. |
| 136 | 104 | 214 | C→T | 72 | Q→Stop | - | N.D. |
| 137 | 84  | 218 | T→A | 73 | L→Stop | - | N.D. |
| 138 | 191 | 218 | T→A | 73 | L→Stop | - | N.D. |
| 139 | 202 | 218 | T→A | 73 | L→Stop | - | N.D. |

§ The number refers to the mutant clone isolate from the selection plates.

\* “+”, indicates lysis in liquid culture, “-”, indicates no lysis in liquid culture.

# “+”, indicates expression levels of the *L* allele comparable to WT, “-”, indicates less than WT expression levels.

N.D. Not determined.
